# Supplementary material for: Electrorefining of Crude Solder for the Production of Fine Solder in Methanesulfonic Acid Medium: Electrolyte Conductivity and Electrorefining Process
Source: PubMed Central journal article supplement — ACS Omega. 2024 Dec 8;9(50):49778–85. doi: 10.1021/acsomega.4c08470 (PMC11656602; doi:10.1021/acsomega.4c08470), 2024-12-08
Supplement: ao4c08470_si_001.pdf [file ao4c08470_si_001.pdf]

# Electrorefining of crude solder for production of fine solder in methanesulfonic acid medium: electrolyte conductivity and electrorefining process

Yuhui Zhang <sup>a</sup>, Kunyun He <sup>b, c</sup>, Bingjie Jin <sup>b, 1</sup>, Jin Luan <sup>b</sup>

<sup>a</sup> School of Chemistry, Biology and Environment, Yuxi Normal University, 653100 Yuxi, Yunnan, P. R. China

<sup>b</sup> Faculty of Metallurgical and Energy Engineering, Kunming University of Science and Technology, 650093 Kunming, Yunnan, P. R. China

<sup>c</sup> Jiangxi Aviation Vocational and Technical College, 330000 Nanchang, Jiangxi, P. R. China

## Supplementary Material

Table S1 Chemical composition of crude solder

| Constituent (%) |      |        |       |        |        |      |        |       |        |      |      |
|-----------------|------|--------|-------|--------|--------|------|--------|-------|--------|------|------|
| Sn              | Pb   | As     | Cu    | Fe     | Ag     | Sb   | Zn     | Al    | Cd     | In   | Ni   |
| 79.29           | 17.7 | 0.0458 | 0.197 | 0.0059 | 0.0871 | 1.29 | 0.0015 | 0.003 | 0.0021 | 0.24 | 0.18 |

Table S2 List of process parameters studied during experiments

| Studied parameters                  | Range     | Fixed parameters                                                                                                            |
|-------------------------------------|-----------|-----------------------------------------------------------------------------------------------------------------------------|
| Current density (A/m <sup>2</sup> ) | 137 - 230 | tin concentration 130 g/L, free-MSA concentration 120 g/L, electrode spacing 4.0 cm, temperature 295.15 K, 4 h              |
| Tin concentration (g/L)             | 90 - 180  | current density 207 A/m <sup>2</sup> , free-MSA concentration 120 g/L, electrode spacing 4.0 cm, temperature 295.15 K, 4 h  |
| Free-MSA concentration (g/L)        | 30 - 120  | current density 207 A/m <sup>2</sup> , tin concentration 130 g/L, electrode spacing 4.0 cm, temperature 295.15 K, 4 h       |
| Electrode spacing (cm)              | 2.5 - 7.0 | current density 207 A/m <sup>2</sup> , tin concentration 130 g/L, free-MSA concentration 100 g/L, temperature 295.15 K, 4 h |
| Temperature (K)                     | 295.15 -  | current density 207 A/m <sup>2</sup> , tin concentration of 130 g/L,                                                        |

<sup>1</sup> Corresponding author. Bingjie JIN, E-mail add.: jinbingjie18@163.com (B. JIN).

Table S3 Chemical composition of fine solder (%)

| Element | Sn    | Pb   | As     | Cu     | Fe     | Ag     | Sb     | Zn     | Al     | In     | Ni     |
|---------|-------|------|--------|--------|--------|--------|--------|--------|--------|--------|--------|
| Content | 98.42 | 1.57 | 0.0004 | <0.001 | 0.0008 | <0.002 | 0.0005 | 0.0002 | 0.0003 | 0.0005 | 0.0004 |
